# Supplementary material
Source: publisher site journal article supplement (https://www.dovepress.com/article/253601)
Supplement: Supplementary file 1 [file get_supplementary_file.php]

**Figure S1**

**Interview guide**

Date and venue:

Name and position of interviewee

1. What were the aims and objectives of the Health Transformation Plan?

2. How the policy entered to the policy agenda? By whom (individuals, groups or organizations). Which groups or organizations were opponents or proponents of the plan?

3. In what extent do you think implementation of the policy was based on evidence (local or global)?

4. How this reform was formulated and implemented?

5. To what extent do you think the HTP was properly implemented and the aims were achieved?

6. How was the financing method of the plan? What were the main reasons for this financing form?

7. What is your opinion about financing method of this reform?

8. Which financing policies were adopted in accordance with the reform?

9. Do you have any evidence to show how far the financing policy of the plan has been accepted by the stakeholders?

10. To what extent do you think the financing policy of the plan was clear (in the objectives, expected results and outcomes)?

11. What are the effects of the plan on financing of public health sector, public hospitals and the health system?

12. Regarding the plan, to what extent do you think Iranian financing health system has had the capacity for

proper implementation of the plan? Which essentials should have been considered before the implementation of the plan?

13. Please explain your general perception about the future of the Health Transformation Plan in Iran regarding the financial dimension of this plan?

14. As a final question, is there any further issue you would like to add?

Note: The questions were adjusted based on each interviewee’s position in health system.
